# Supplementary material for: Notch3 functions as a regulator of cell self-renewal by interacting with the β-catenin pathway in hepatocellular carcinoma
Source: PubMed Central journal article supplement (PMC4414145; doi:10.18632/oncotarget.2898), 2015-02-11
Supplement: oncotarget-06-3669-s001.pdf [file oncotarget-06-3669-s001.pdf]

**SUPPLEMENTARY FIGURE**

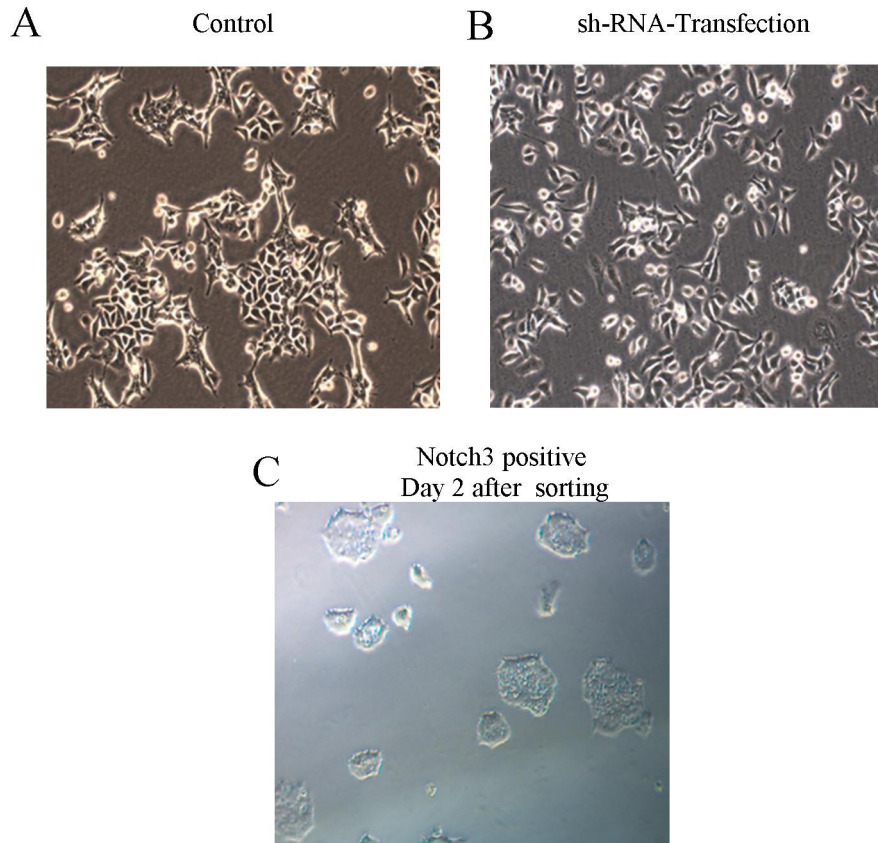

**Supplementary Figure S1:** The QGY7701 cells before the lenti-shRNA transfection (**A**); QGY7701 cells after transfection with the lenti-shRNA (**B**); QGY7701 cells were sorted with FACS and cultured for 2 days (**C**).
